# Supplementary material for: Catalytic allylic arylation of cinnamyl carbonates over palladium nanoparticles supported on a thermoresponsive polymer in water
Source: Royal Society of Chemistry journal article supplement (doi:10.1039/c5gc00745c), 2015-01-01
Supplement: c5gc00745c1.pdf [file c5gc00745c1.pdf]

## Supporting Information

### Catalytic Allylic Arylation of Cinnamyl Carbonates over Palladium

### Nanoparticles Supported on a Thermoresponsive Polymer in Water

Yongwoo Lee,<sup>a</sup> Saira Shabbir,<sup>b</sup> Sinyoung Lee,<sup>a</sup> Hyunsoek Ahn<sup>a</sup> and Hakjune Rhee<sup>\*a,b</sup>

<sup>[a]</sup>Department of Bionanotechnology, Hanyang University  
Sangnok-gu, Ansan-si, Gyeonggi-do, 426-791, South Korea

<sup>[b]</sup>Department of Chemistry and Applied Chemistry, Hanyang University  
Sangnok-gu, Ansan-si, Gyeonggi-do, 426-791, South Korea

\*Corresponding author

E-mail: hrhee@hanyang.ac.kr

Tel: (+82) 31-400-5498

Fax: (+82) 31-400-5457

hrhee@hanyang.ac.kr

## Table of Contents

|                                                                            |     |
|----------------------------------------------------------------------------|-----|
| Differential Scanning Calorimetry (DSC) curve of poly(NIPAM-co-4-VP) ..... | S3  |
| Energy Dispersive X-ray Analysis (EDXA) measurements .....                 | S3  |
| X-ray Photon Spectroscopy (XPS) Analysis .....                             | S3  |
| Inductively Coupled Plasma (ICP) Report .....                              | S4  |
| Spectroscopic data of the products .....                                   | S4  |
| References .....                                                           | S11 |

### Differential Scanning Calorimetry (DSC) curve of poly(NIPAM-co-4-VP)

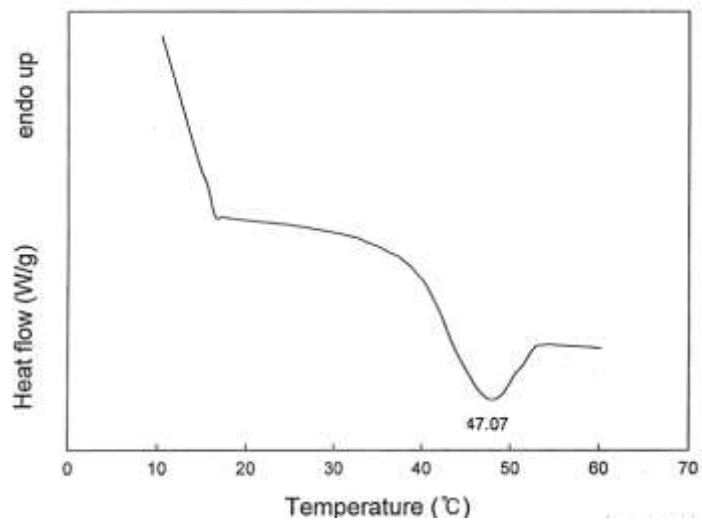

Figure S1. Differential Scanning Calorimetry (DSC) curve of poly(NIPAM-co-4-VP)

### Energy Dispersive X-ray Analysis (EDXA) measurements

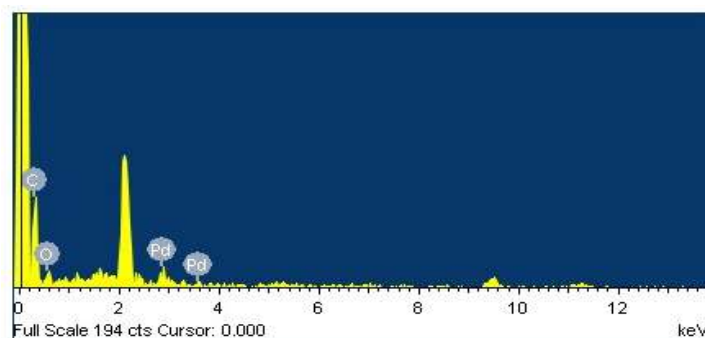

Figure S2. Energy Dispersive X-ray Analysis (EDXA) measurements of the catalyst

### X-ray Photon Spectroscopy (XPS) Analysis

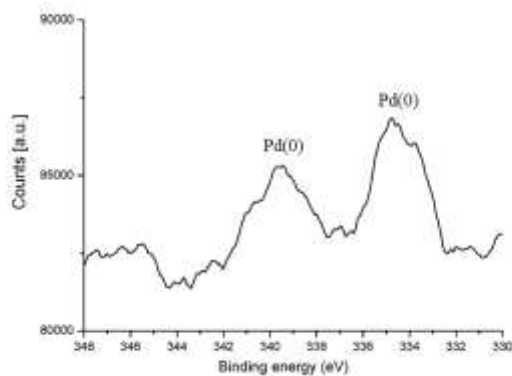

Figure S4. X-ray Photon Spectroscopy (XPS) spectrum of the fresh catalyst

## Inductively Coupled Plasma (ICP) Report

**Table S1.** Inductively Coupled Plasma (ICP) quantitative measurements for Pd(0) in fresh catalyst and the reaction mixture.

| Entry | Sample Name | Sample         | Element investigated | Result (ppm) | Observation                                                        |
|-------|-------------|----------------|----------------------|--------------|--------------------------------------------------------------------|
| 1     | Pd@PNIPAM   | Fresh catalyst | Pd                   | 19600        | 0.184mmol Pd/g of polymer                                          |
| 2     | water       | Filtrate       | Pd                   | 20           | Insignificant leaching out of Pd after the 1 <sup>st</sup> recycle |

## Spectroscopic data of the products

### NMR Spectroscopic data of Cinnamyl methyl carbonates (1a-c) and the coupling products of allylic arylation (3a-l)

**Cinnamyl methyl carbonate (1a):**<sup>1</sup> Colorless oil, 3.229 g (84%);  $R_f = 0.37$  (hexanes/EtOAc, 20/1, v/v) <sup>1</sup>H

NMR (400 MHz, CDCl<sub>3</sub>, TMS):  $\delta$  7.26-7.41 (m, 5H, ArH), 6.69 (d,  $J = 16.0$  Hz, 1H, CH=), 6.30 (dt,  $J = 15.6, 6.4$  Hz, 1H, CH=), 4.79 (d,  $J = 6.4$  Hz, 2H, CH<sub>2</sub>), 3.81 (s, 3H, OCH<sub>3</sub>).

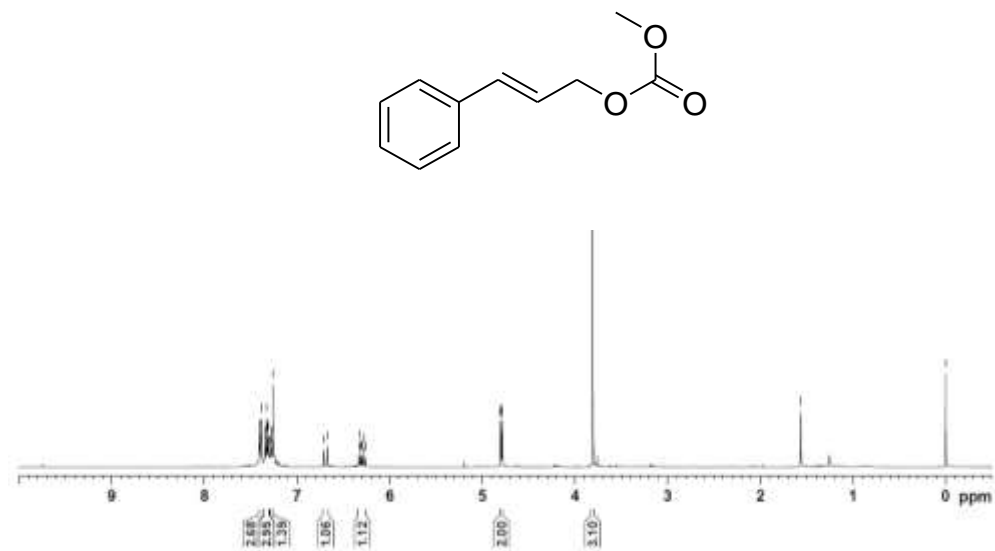

**(E)-3-(4-Fluorophenyl)allyl methyl carbonate (1b):**<sup>1</sup> Colorless oil, 3.447 g (82%);  $R_f = 0.52$

(hexanes/EtOAc, 20/1, v/v); <sup>1</sup>H NMR (400 MHz, CDCl<sub>3</sub>, TMS):  $\delta$  7.36 (dd,  $J = 8.8, 5.6$  Hz, 2H, ArH), 7.02 (t,  $J =$

8.8 Hz, 1H, ArH, CH=), 6.65 (d,  $J = 15.6$  Hz, 1H, CH=), 6.22 (dt,  $J = 15.6, 6.4$  Hz, 2H, ArH), 4.78 (dd,  $J = 6.8,$   
1.6 Hz, 2H, CH<sub>2</sub>), 3.81 (s, 3H, OCH<sub>3</sub>).

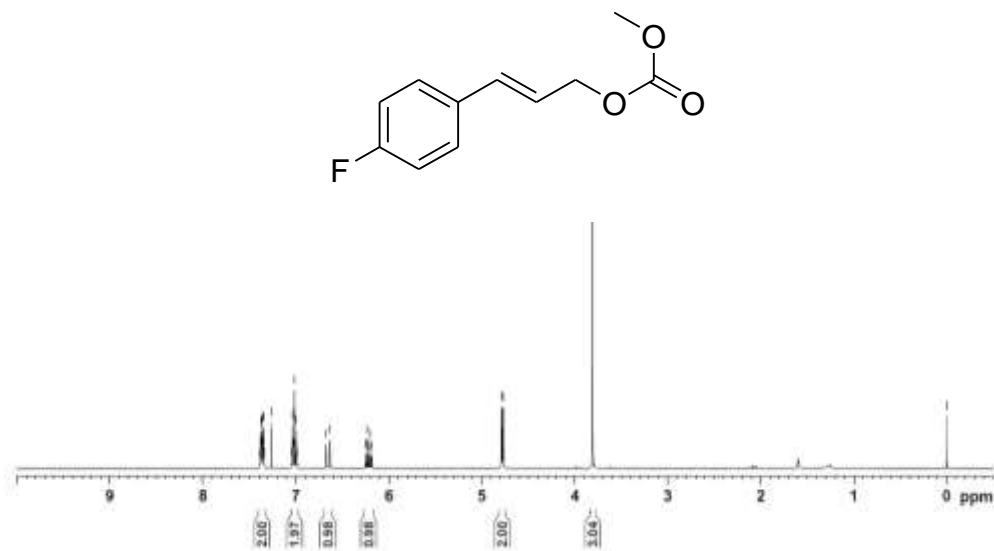

**(E)-3-(4-Methoxyphenyl)allyl methyl carbonate (1c):**<sup>1</sup> Yellowish gummy solid, 3.911 g (88%);  $R_f = 0.24$   
(hexanes/EtOAc, 20/1, v/v); <sup>1</sup>H NMR (400 MHz, CDCl<sub>3</sub>, TMS):  $\delta$  7.33 (d,  $J = 8.4$  Hz, 2H, ArH), 6.86 (d,  $J = 8.8$   
Hz, 2H, ArH), 6.64 (d,  $J = 16.0$  Hz, 1H, CH=), 6.16 (dt,  $J = 15.6, 6.8$  Hz, 1H, CH=), 4.77 (dd,  $J = 6.4, 1.2$  Hz, 2H,  
CH<sub>2</sub>), 3.81 (s, 3H, OCH<sub>3</sub>).

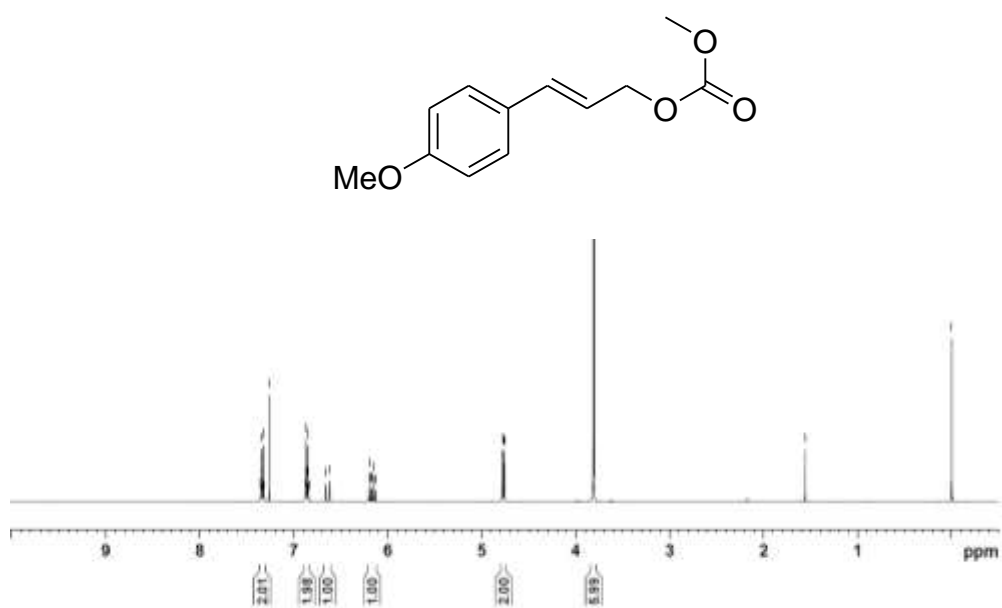

**(1E)-1,3-Diphenylpropene (3a):**<sup>2</sup> Colorless oil, 0.184 g (95%);  $R_f = 0.71$  (hexanes/EtOAc, 10/1, v/v);  $^1\text{H}$  NMR (400 MHz,  $\text{CDCl}_3$ , TMS):  $\delta$  7.18-7.37 (m, 10H, ArH), 6.46 (d,  $J = 16.0$  Hz, 1H, CH=), 6.36 (dt,  $J = 16.0, 6.4$  Hz, 1H, CH=), 3.55 (d,  $J = 6.4$  Hz, 2H,  $\text{CH}_2$ ).

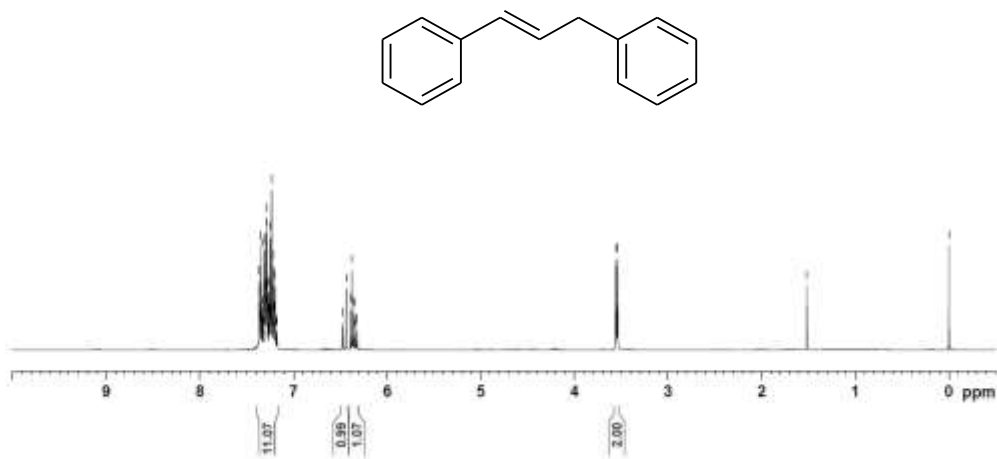

**(1E)-3-(4-Methylphenyl)-1-phenylpropene (3b):**<sup>2</sup> Colorless oil, 0.195 g (94%);  $R_f = 0.75$  (hexanes/EtOAc, 10/1, v/v);  $^1\text{H}$  NMR (400 MHz,  $\text{CDCl}_3$ , TMS):  $\delta$  7.36 (d,  $J = 7.6$  Hz, 2H, ArH), 7.29 (t,  $J = 7.2$  Hz, 2H, ArH), 7.20 (t,  $J = 7.2$  Hz, 1H, ArH), 7.13 (m, 4H, ArH), 6.45 (d,  $J = 15.6$  Hz, 1H, CH=), 6.35 (dt,  $J = 16.0, 6.4$  Hz, 1H, CH=), 3.52 (d,  $J = 6.8$  Hz, 2H,  $\text{CH}_2$ ), 2.34 (s, 3H,  $\text{CH}_3$ ).

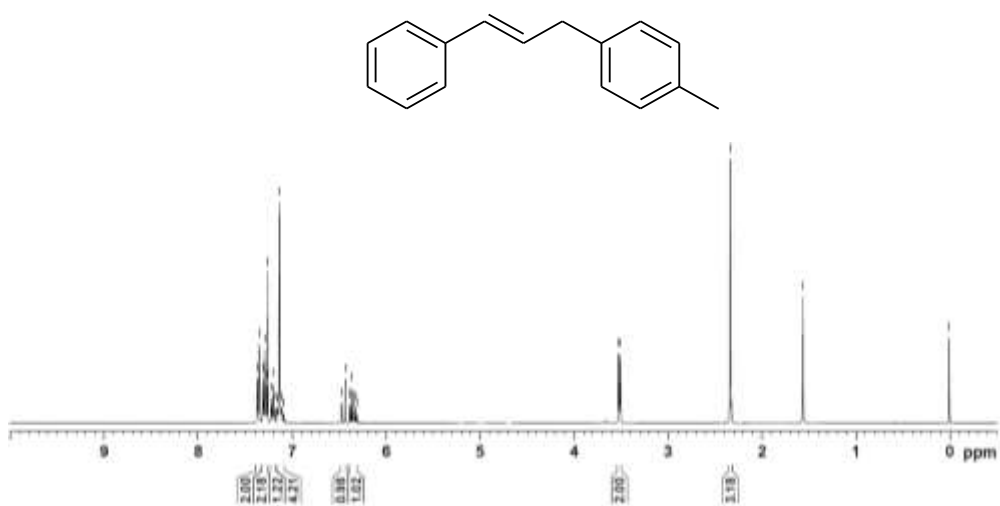

**(1E)-3-(4-Chlorophenyl)-1-phenylpropene (3c):**<sup>2</sup> Colorless oil, 0.192 g (96%);  $R_f = 0.59$  (hexanes/EtOAc, 10/1, v/v);  $^1\text{H NMR}$  (400 MHz,  $\text{CDCl}_3$ , TMS):  $\delta$  7.36 (d,  $J = 7.6$  Hz, 2H, ArH), 7.26-7.32 (m, 4H, ArH), 7.16-7.24 (m, 3H, ArH), 6.44 (d,  $J = 16.0$  Hz, 1H, CH=), 6.31 (dt,  $J = 16.0, 6.4$  Hz, 1H, CH=), 3.52 (d,  $J = 6.8$  Hz, 2H,  $\text{CH}_2$ ).

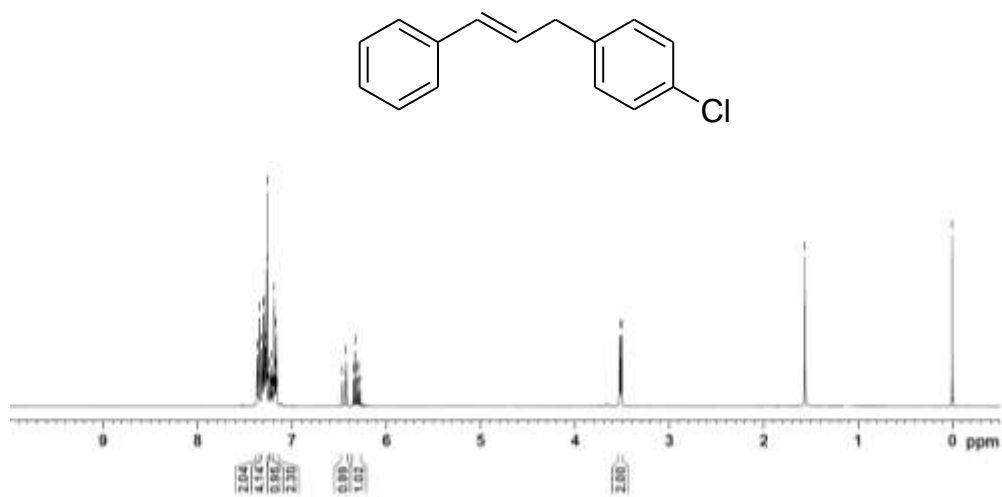

**(1E)-3-(4-Methoxyphenyl)-1-phenylpropene (3d):**<sup>2</sup> Colorless oil, 0.203 g (91%);  $R_f = 0.60$  (hexanes/EtOAc, 10/1, v/v);  $^1\text{H NMR}$  (400 MHz,  $\text{CDCl}_3$ , TMS):  $\delta$  7.36 (d,  $J = 7.6$  Hz, 2H), 7.29 (t,  $J = 7.2$  Hz, 2H, ArH), 7.19 (t,  $J = 7.6$  Hz, 1H, ArH), 7.16 (d,  $J = 8.4$  Hz, 2H, ArH), 6.86 (d,  $J = 8.0$  Hz, 2H, ArH), 6.43 (d,  $J = 15.6$  Hz, 1H, CH=), 6.34 (dt,  $J = 16.0, 6.4$  Hz, 1H, CH=), 3.80 (s, 3H,  $\text{OCH}_3$ ), 3.49 (d,  $J = 6.4$  Hz, 2H,  $\text{CH}_2$ ).

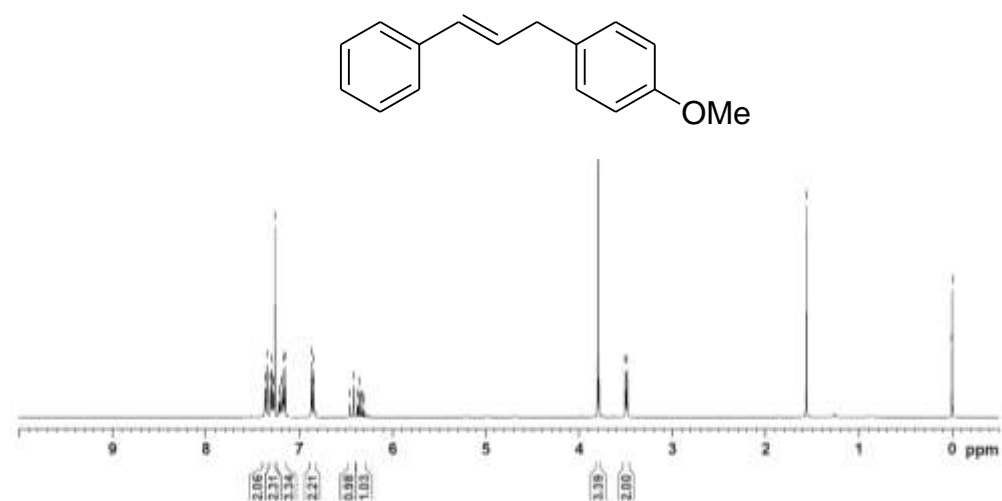

**(1E)-3-(4-Hydroxyphenyl)-1-phenylpropene (3e):**<sup>3</sup> White solid, 0.193 g (92%), mp. 64-65  $^\circ\text{C}$ ;  $R_f = 0.32$  (hexanes/EtOAc, 10/1, v/v);  $^1\text{H NMR}$  (400 MHz,  $\text{CDCl}_3$ , TMS):  $\delta$  7.42 (d,  $J = 7.2$  Hz, 2H, ArH), 7.27-7.35 (m, 4H,

ArH), 6.97 (d,  $J = 7.2$  Hz, 2H, ArH), 6.74 (d,  $J = 16.0$  Hz, 1H, CH=), 6.52 (dt,  $J = 15.6, 6.0$  Hz, 1H, CH=), 4.71 (d,  $J = 5.8$  Hz, 2H, CH<sub>2</sub>).

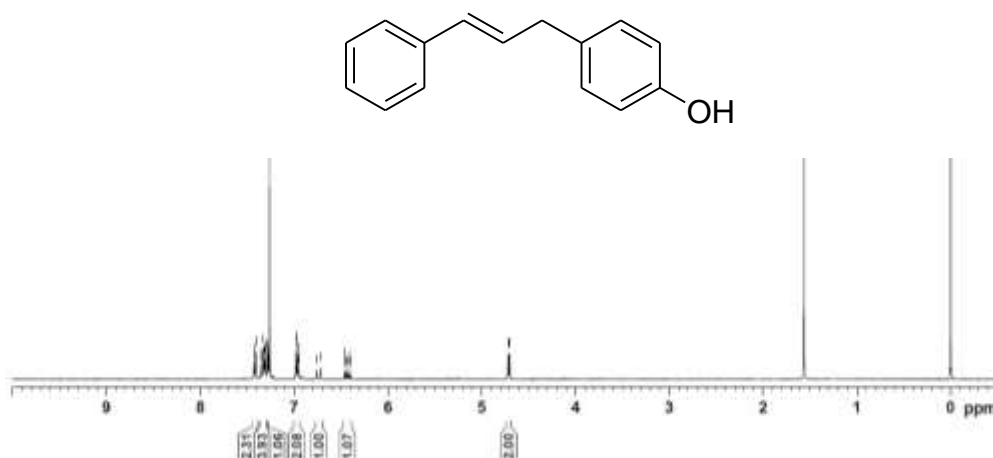

**(1E)-3-(4-Formylphenyl)-1-phenylpropene (3f):**<sup>4</sup> Colorless oil, 0.199 g (90%);  $R_f = 0.37$  (hexanes/EtOAc, 10/1, v/v); <sup>1</sup>H NMR (400 MHz, CDCl<sub>3</sub>, TMS):  $\delta$  9.99 (s, 1H, CHO), 7.84 (d,  $J = 8.0$  Hz, 2H, ArH), 7.29-7.43 (m, 7H, ArH), 6.49 (d,  $J = 15.6$  Hz, 1H, CH=), 6.34 (dt,  $J = 15.6, 6.8$  Hz, 1H, CH=), 3.64 (d,  $J = 6.8$  Hz, 2H, CH<sub>2</sub>).

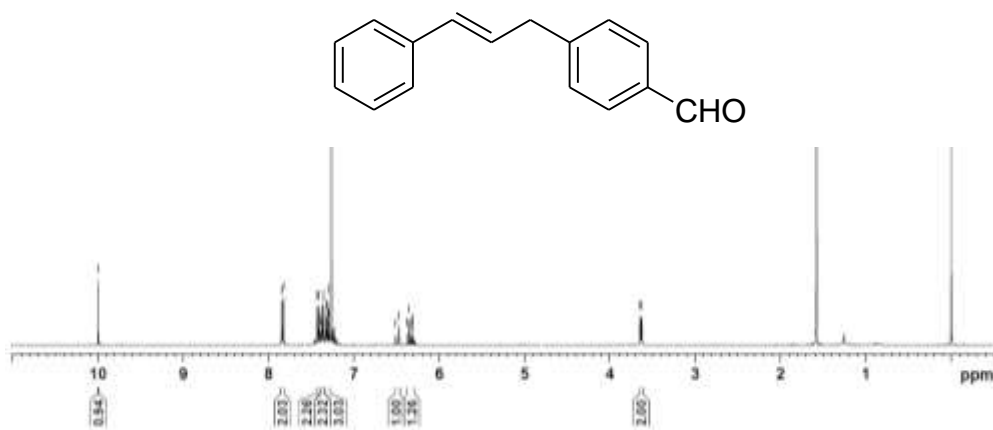

**(1E)-3-(4-Carboxyphenyl)-1-phenylpropene (3g):**<sup>5</sup> Colorless oil, 0.205 g (86%);  $R_f = 0.36$  (hexanes/EtOAc, 20/1, v/v); <sup>1</sup>H NMR (400 MHz, CDCl<sub>3</sub>, TMS):  $\delta$  8.09 (d,  $J = 6.8$  Hz, 2H, ArH), 7.57 (t,  $J = 7.6$  Hz, 1H, ArH), 7.26-7.48 (m, 6H, ArH), 6.75 (d,  $J = 16.0$  Hz, 1H, CH=), 6.42 (dt,  $J = 16.0, 6.4$  Hz, 1H, CH=), 4.99 (d,  $J = 6.4$  Hz, 2H, CH<sub>2</sub>).



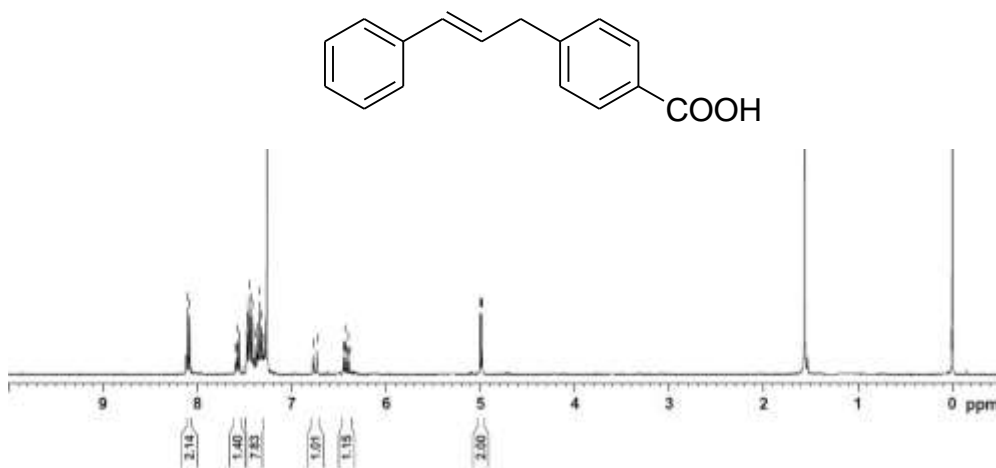

**(1E)-3-(4-Methoxycarbonylphenyl)-1-phenylpropene (3h):**<sup>6</sup> Colorless oil, 0.216 g (86%);  $R_f = 0.38$  (hexanes/EtOAc, 20/1, v/v);  $^1\text{H NMR}$  (400 MHz,  $\text{CDCl}_3$ , TMS):  $\delta$  7.98 (d,  $J = 8.4$  Hz, 2H, ArH), 7.21-7.37 (m, 7H, ArH), 6.47 (d,  $J = 15.6$  Hz, 1H, CH=), 6.33 (dt,  $J = 16.0, 6.8$  Hz, 1H, CH=), 3.91 (s, 3H,  $\text{COOCH}_3$ ), 3.60 (d,  $J = 6.8$  Hz, 2H,  $\text{CH}_2$ ).

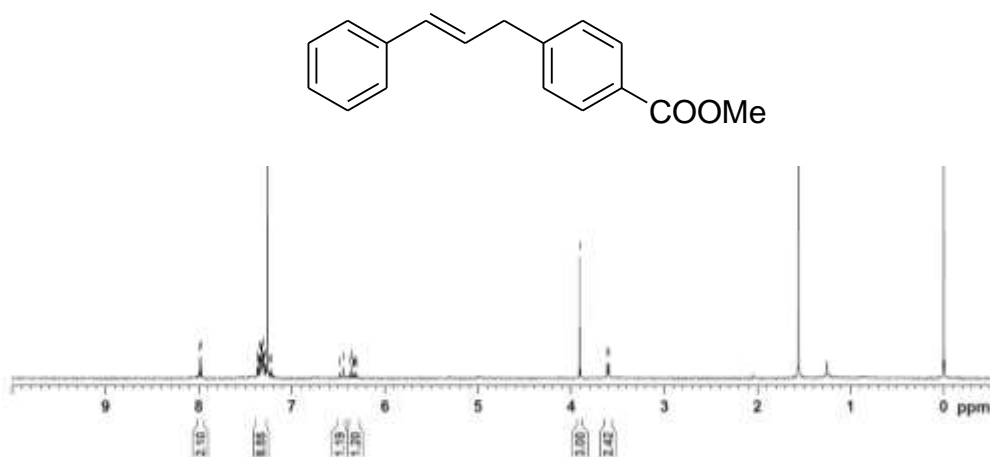

**(1E)-3-(4-Nitrophenyl)-1-phenylpropene (3i):**<sup>7</sup> Colorless oil, 0.201 g (84%);  $R_f = 0.40$  (hexanes/EtOAc, 20/1, v/v);  $^1\text{H NMR}$  (400 MHz,  $\text{CDCl}_3$ , TMS):  $\delta$  8.18 (d,  $J = 8.8$  Hz, 2H, ArH), 7.30-7.42 (m, 7H, ArH), 6.49 (d,  $J = 15.6$  Hz, 1H, CH=), 6.31 (dt, 15.6, 6.8 Hz, 1H, CH=), 3.65 (d,  $J = 6.4$  Hz, 2H,  $\text{CH}_2$ ).

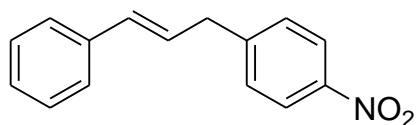

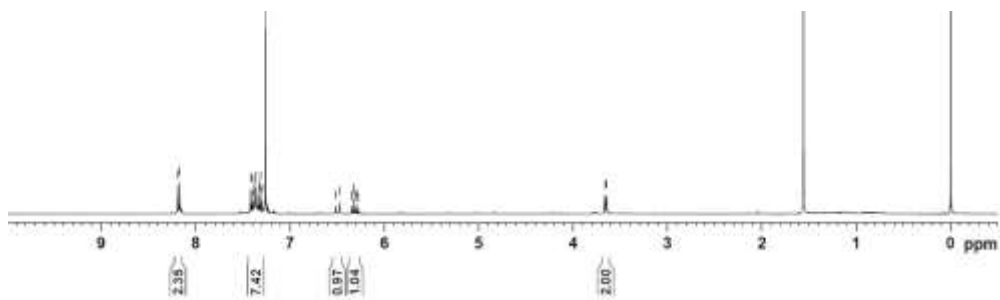

**(1E)-3-Biphenyl-1-phenylpropene (3j):**<sup>8</sup> Colorless oil, 0.256 g (95%);  $R_f = 0.75$  (hexanes/EtOAc, 20/1, v/v);

<sup>1</sup>H NMR (400 MHz, CDCl<sub>3</sub>, TMS):  $\delta$  7.19-7.61 (m, 14H, ArH), 6.50 (d,  $J = 16.0$  Hz, 1H, CH=), 6.39 (dt,  $J = 16.0$ , 6.4 Hz, 1H, CH=), 3.59 (d,  $J = 6.8$  Hz, 2H, CH<sub>2</sub>).

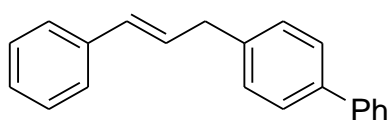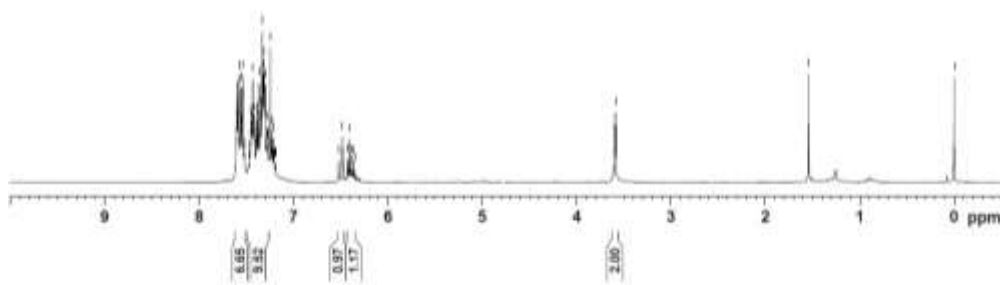

**(1E)-1-(4-Fluorophenyl)-3-phenylpropene (3k):**<sup>2</sup> Colorless oil, 0.197 g (93%);  $R_f = 0.74$  (hexanes/EtOAc,

4/1, v/v); <sup>1</sup>H NMR (400 MHz, CDCl<sub>3</sub>, TMS):  $\delta$  7.29-7.34 (m, 4H, ArH), 7.23-7.25 (m, 3H, ArH), 6.98 (t,  $J = 8.8$  Hz, 2H, ArH), 6.41 (d,  $J = 16.0$  Hz, 1H, CH=), 6.27 (dt,  $J = 15.6$ , 6.8 Hz, 1H, CH=), 3.54 (d,  $J = 6.4$  Hz, 2H, CH<sub>2</sub>).

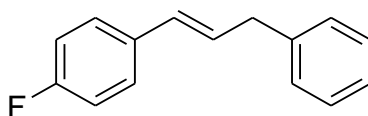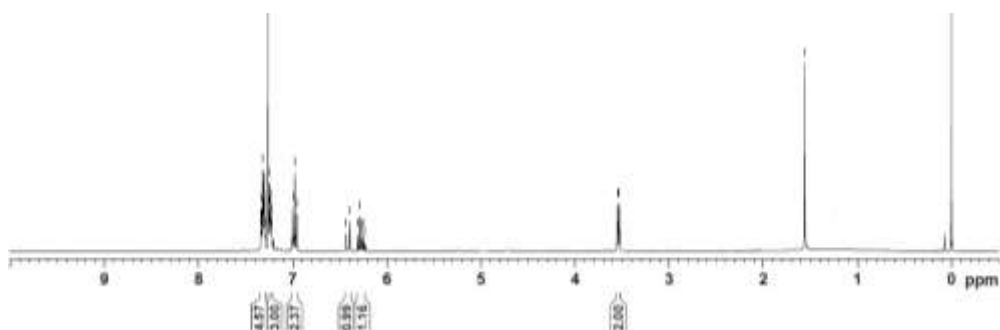

**(1E)-1-(4-Methoxyphenyl)-3-phenylpropene (3I):**<sup>2</sup> White solid, 0.206 g (92%), mp. 29-30 °C;  $R_f = 0.40$  (hexanes/EtOAc, 20/1, v/v),  $^1\text{H NMR}$  (400 MHz,  $\text{CDCl}_3$ , TMS):  $\delta$  7.19-7.33 (m, 7H, ArH), 6.83 (d,  $J = 8.8$  Hz, 2H, ArH), 6.40 (d,  $J = 15.6$  Hz, 1H, CH=), 6.21 (dt,  $J = 15.6, 6.8$  Hz, 1H, CH=), 3.79 (s, 3H,  $\text{OCH}_3$ ), 3.53 (d,  $J = 6.8$  Hz, 2H,  $\text{CH}_2$ ).

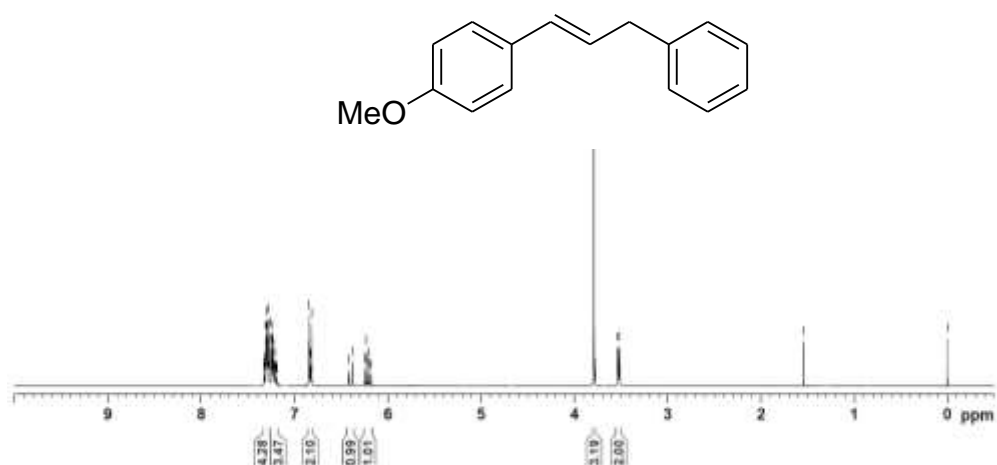

## References

1. B. M. Trost, J. R. Miller, C. M. Hoffman Jr. *J. Am. Chem. Soc.* **2011**, *133*, 8165-8167.
2. S. M. Sarkar, Y. Uozumi, Y. M. A. Yamada, *Angew. Chem. Int. Ed.* **2011**, *50*, 9437-9441.
3. L. Lurd, *Tetrahedron Lett.* **1969**, *33*, 2863-2866.
4. H. Tsukamoto, T. Uchiyama, T. Suzuki, Y. Kondo, *Org. Biomol. Chem.* **2008**, *6*, 3005-3013.
5. R. Deziel, A. Ajamian, US 8796330, **2014**.
6. X. Cui, S. Wang, Y. Zhang, W. Deng, Q. Qian, H. Gong, *Org. Biomol. Chem.* **2013**, *11*, 3094-3097.
7. J. Lia, J. Penga, Y. Baia, L.Chena, G. Lai, *Phosphorus, Sulfur Silicon Relat. Elem.* **2011**, *186*, 1621-1625.
8. M. Li, Y. Wang, S. Tian, *Angew. Chem. Int. Ed.* **2012**, *51*, 2968-2971.
